# Supplementary material
Source: PubMed Central journal article supplement (PMC498025)

# Child health card

टाबर ने झट अस्पताल लाओ जदी...

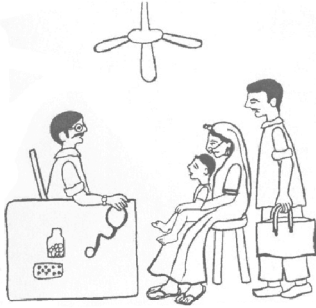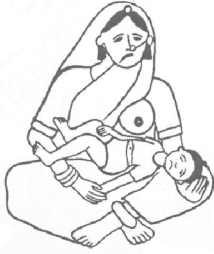

धावे नी

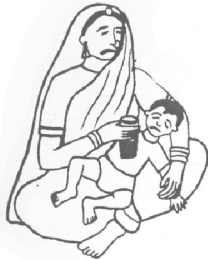

खावे पीवे नी

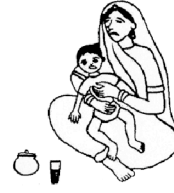

सस्त वेई जावे

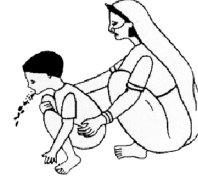

सब कुछ उलट दे

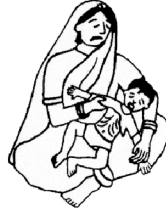

हा चाले

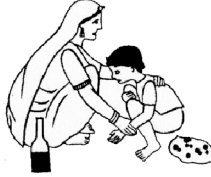

दस्ता लारे खून आवे

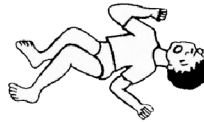

ताण आवे

Supplement: bmj_38149.703380.47_1.pdf [file bmj_38149.703380.47_1.pdf]
